# Supplementary material
Source: PubMed Central journal article supplement (PMC6700734)
Supplement: NIHMS1514367-supplement-1.pdf [file NIHMS1514367-supplement-1.pdf]

## **SUPPLEMENTARY FIGURES AND TABLE**

### **hESC-based human glial chimeric mice reveal glial differentiation defects in Huntington disease**

Mikhail Osipovitch<sup>1\*</sup>, Andrea Asenjo-Martinez<sup>1\*</sup>, John Mariani<sup>2</sup>, Adam Cornwell<sup>2</sup>, Simrat Dhaliwal<sup>2</sup>, Lisa Zou<sup>2</sup>, Devin Chandler-Militello<sup>2</sup>, Su Wang<sup>2</sup>, Xiaojie Li<sup>2</sup>, Sarah-Jehanne Benraiss<sup>2</sup>, Robert Agate<sup>2</sup>, Andrea Lampp<sup>1</sup>, Abdellatif Benraiss<sup>2</sup>, Martha S. Windrem<sup>2</sup>, Steven A. Goldman<sup>1,2,3\*\*</sup>

<sup>1</sup>Center for Translational Neuromedicine, University of Copenhagen Faculty of Health and Medical Science, 2200 Copenhagen N, Denmark; <sup>2</sup>Center for Translational Neuromedicine, University of Rochester Medical Center, Rochester, NY, 10021, USA; <sup>3</sup>Neuroscience Center, Rigshospitalet-Copenhagen University Hospital, Copenhagen, Denmark.

## **SUPPLEMENTARY INFORMATION**

**Includes:**

**7 Supplementary Figures**

**2 Supplementary Tables**

SUPPLEMENTARY FIGURES

**Figure S1** (*Supplementary to Figure 1*)  
**Genes differentially-expressed between hGPCs derived from different HD hESCs vs. pooled controls**

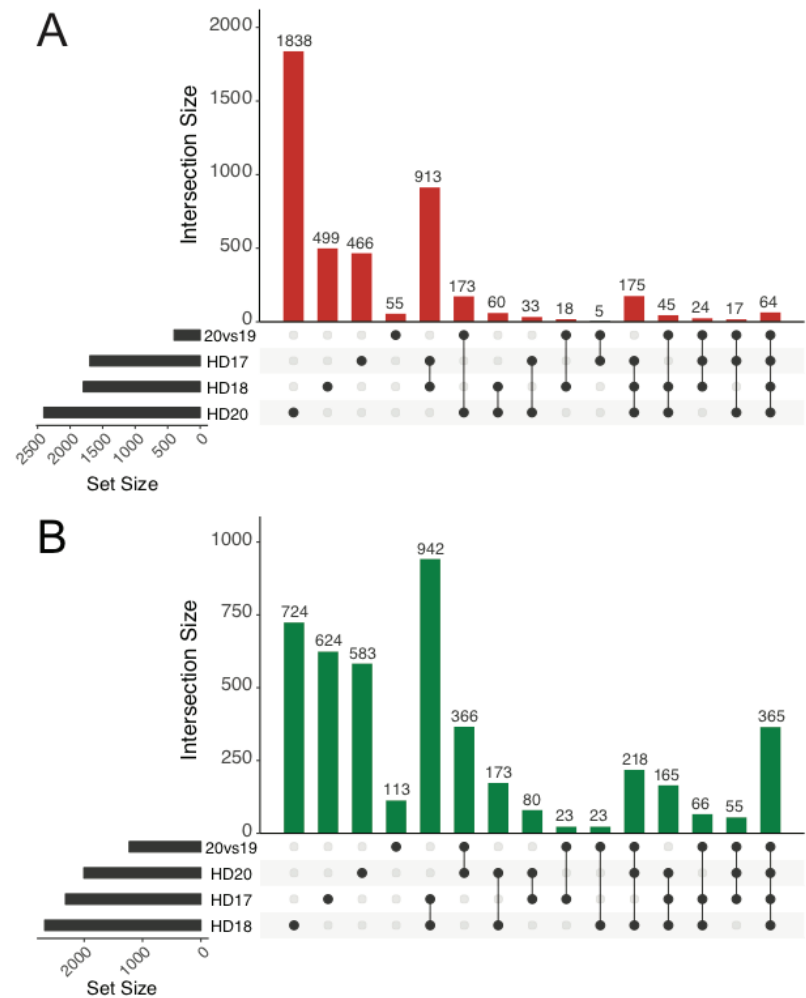

**A-B**, Gene set intersection plots for differentially expressed genes obtained from comparisons of each CD140a-sorted HD-derived GPC line (HD17, HD18, and HD20), compared to pooled control-derived GPCs (**A**, up-regulated genes; **B**, down-regulated genes). Differentially expressed genes in HD GPCs are significant at 1% FDR and FC > 2.00. **C-D**, CD44-sorted HD-derived APC line (HD17, HD18, and HD20) against control-derived APCs (**C**, up-regulated; **D**, down-regulated). Differentially expressed genes in HD APCs are significant at 5% FDR. In both, 20 vs 19 denotes the comparison of HD line HD20 (Genea20) against its sibling control line CTR19 (Genea19). Horizontal bars represent total sizes of gene sets, and vertical bars represent sizes of gene set intersections. Vertical bars are ordered first by the number of gene sets in the intersection, and then by the size of the intersection. The dots correspond to those gene sets comprising each intersection.

**Figure S2 (Supplementary to Figure 1)**

**Functional annotation reveals HD-associated impairment in transcription of glial differentiation, myelination, and synaptic transmission-related genes**

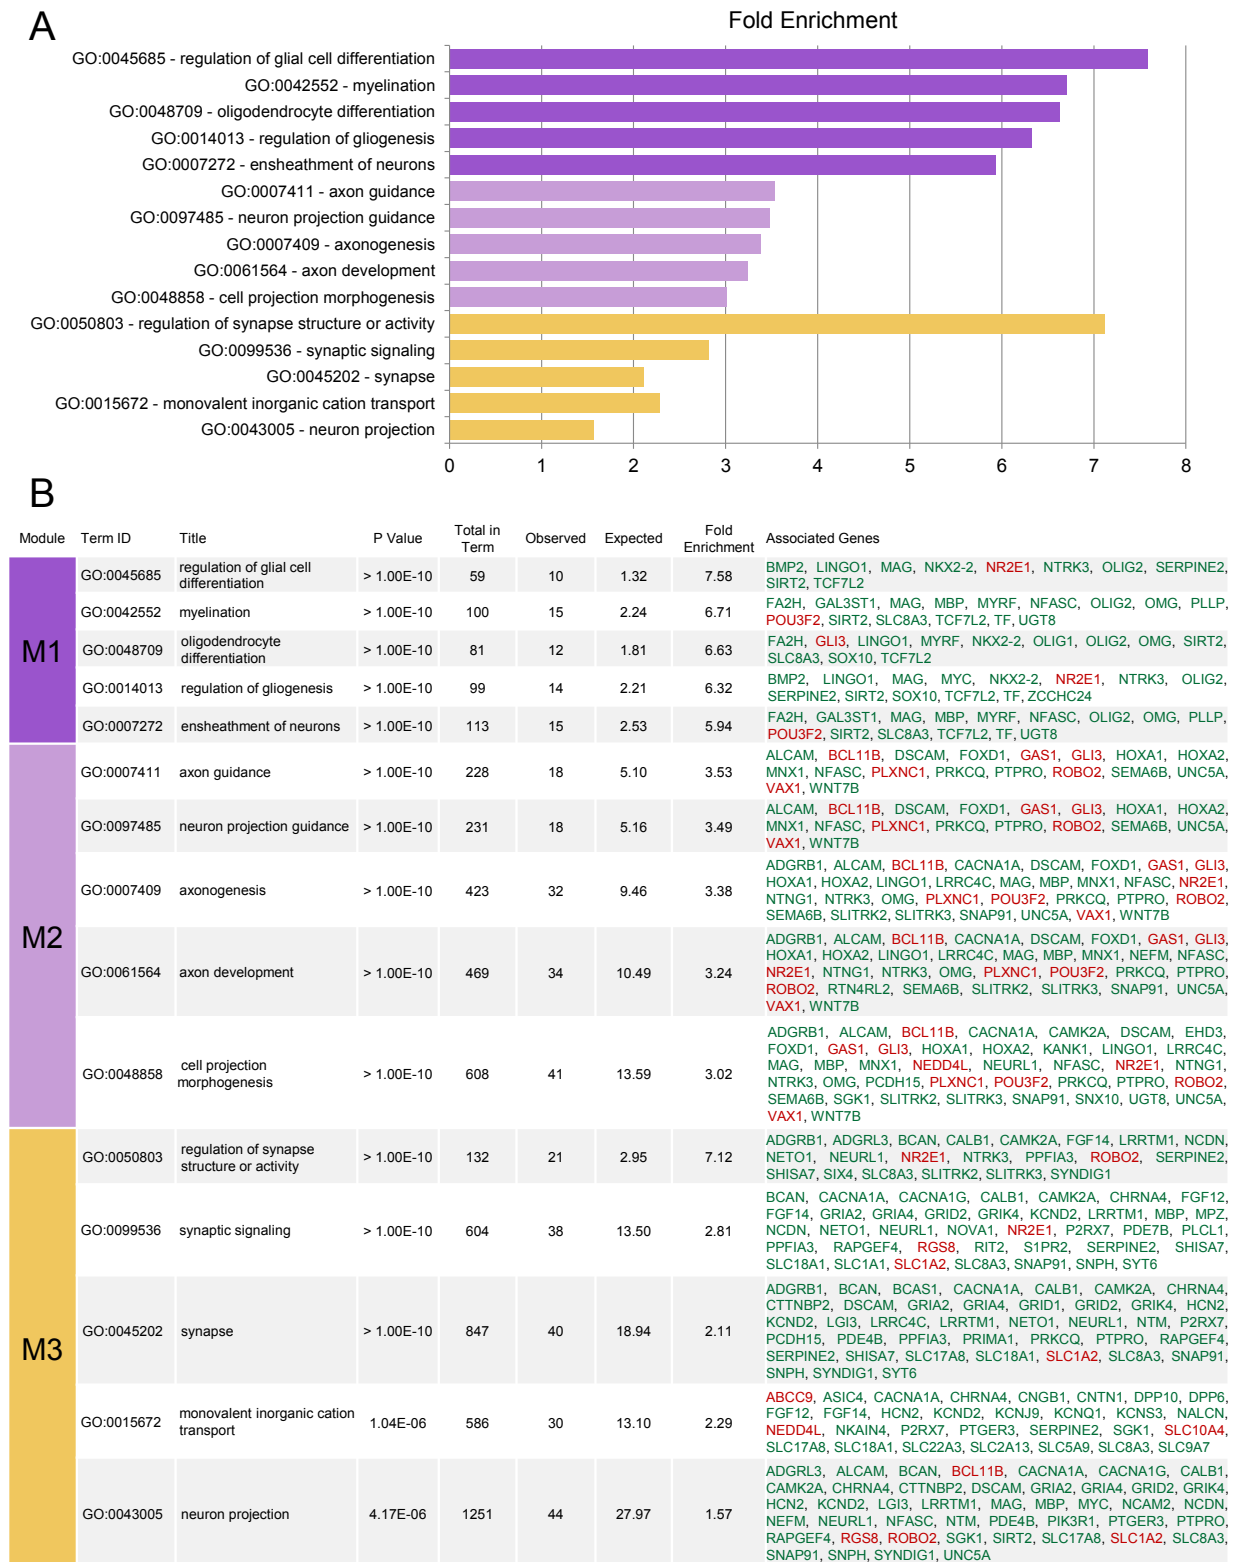

**Figure S2** (*cont'd*)

Gene Ontology (GO) functional annotation was performed for the 429 differentially expressed genes (DEGs) in the 3 lines of mHTT hGPCs relative to pooled control hGPCs (see **Figure 1B-C**). 50 significantly associated GO annotation terms (Biological Process and Cellular Component, Bonferroni-corrected  $p < 0.01$ ) were identified by the ToppCluster annotation tool (Kaimal et al., 2010). By network analysis, these GO terms together with their associated DEGs were grouped into three functionally related modules (M1 through M3, see **Figure 1D**). For each GO term, the expected value assumes a constant ratio, given the number of annotated DEGs and the total number of human protein-coding genes found in the term. The fold enrichment is the ratio of the number of observed DEGs found in the term, to the expected number. Within each functional module, the GO terms were ranked first by p value, then by fold-enrichment. Three GO terms, GO:0007268 (chemical synaptic transmission), GO:0098916 (anterograde trans-synaptic signaling), and GO:0099537 (trans-synaptic signaling), were respectively ranked 3 through 5 within module M3. They contained an identical set of 37 associated DEGs, which were contained within the 38 DEGs associated to GO:0099536 (synaptic signaling) ranked at number 2 in M3. To reduce redundancy, these three GO terms were thus omitted from the figure. **A**, The bar graph shows the top 5 GO terms for each functional module. **B**, The table lists the calculated values and the associated DEGs for each of the top-ranked terms. Associated DEGs are color-coded according to their direction of dysregulation in HD- vs. control-derived hGPCs (*green*, down-regulated; *red*, up-regulated).

**Figure S3 (Supplementary to Figure 1)**  
**Human and mouse glia exhibited overlap in genes dysregulated as a function of CAG repeat length**

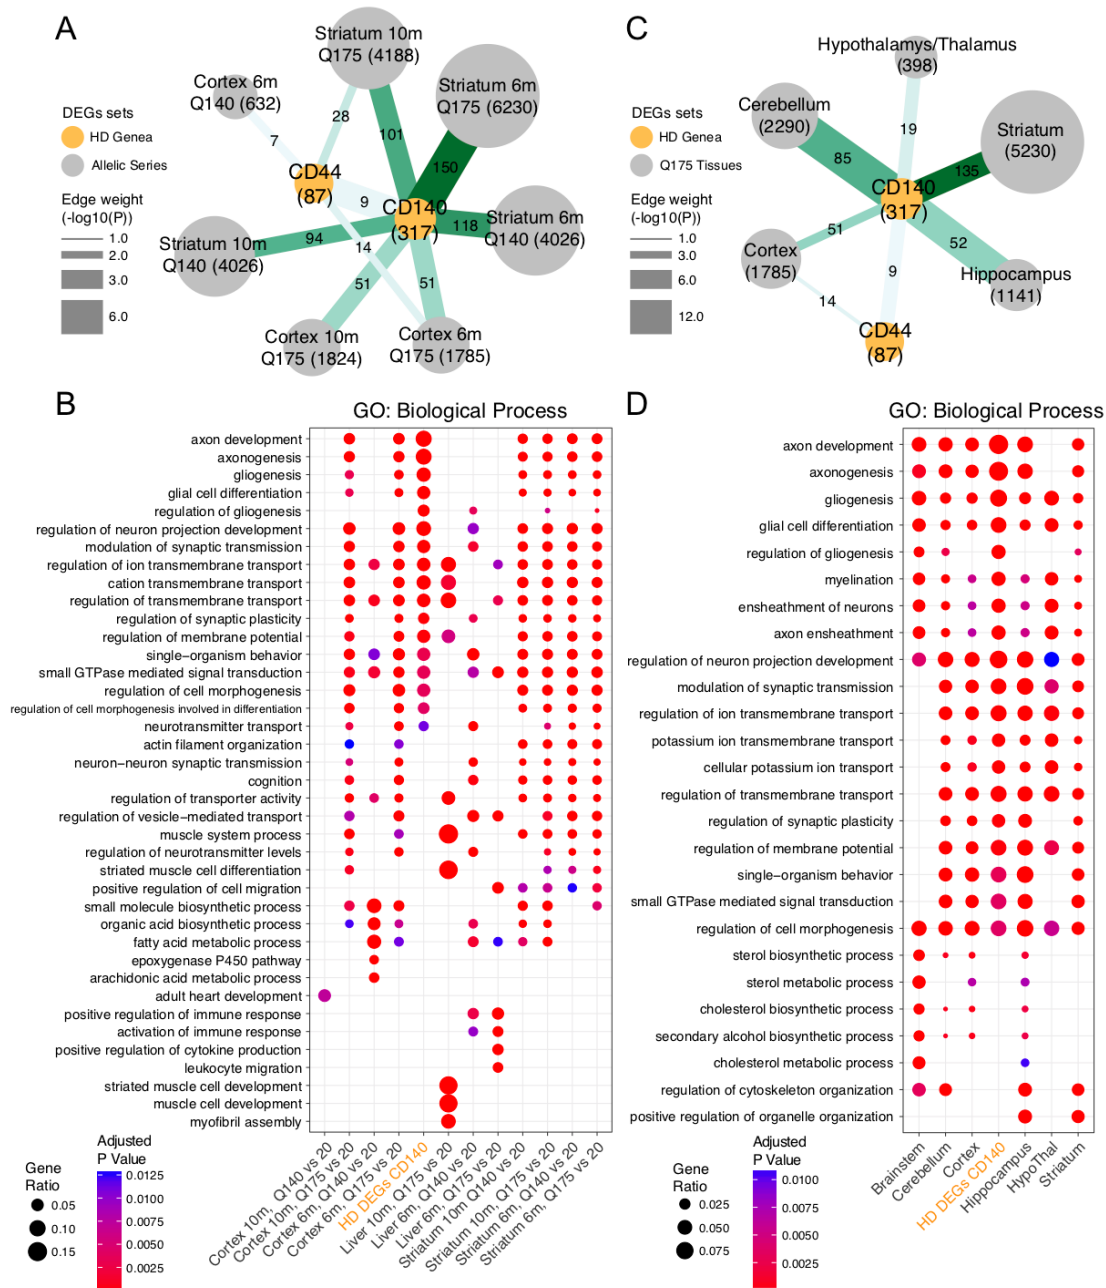

There was a high degree of overlap between those hGPC genes and ontologies found to be increasingly dysregulated with longer CAG repeat length in hGPCs, with those noted to be dysregulated with CAG repeat length in mouse brain tissue (Langfelder et al., 2016). **A**, The representative lists of differentially expressed genes (DEGs) obtained from the HD-derived CD140-sorted GPCs, and the HD-derived CD44-sorted APCs were compared against the differential expression results of the mouse *mHtt* allelic series (**A** and **B**) and the 6-month Q175 profiled tissues (**C**

and **D**) from (Langfelder et al., 2016). The network plots in **A** and **C** show the significant pairwise set intersections between the CD140 and CD44 HD Genea-derived DEGs sets (*yellow* nodes), and the DEGs sets from the Langfelder et al. (2016) analysis (*grey* nodes) (Fisher's exact test,  $p < 0.05$ ). The nodes are sized according to the total number of DEGs, indicated in parenthesis for each node. The numbers of DEGs in the HD Genea sets are post-ID conversion to mouse orthologue genes. The edge thickness indicates the significance of the gene set intersection, calculated as  $-\log_{10}$  (Fisher's exact test  $p$  value). Edge color and label show the number of genes in the pairwise set intersection. Only the Langfelder et al. (2016) DEG sets that had a significant overlap to either of the two HD Genea sets are shown. The dot plots in **B** and **D** show the comparisons of Gene Ontology (GO): Biological Process annotation results for the DEGs sets in **A** and **C**, respectively. The dots are sized according to the gene ratio with respect to the DEGs set. The dot color represents the significance of the association to the GO term. All DEGs sets that had significant annotation (BH-corrected  $p < 0.01$ ) are shown.

The most significant intersections were observed between the CD140 DEGs set and the DEGs in the 6-month striatum Q175 samples ( $p = 1.10 \times 10^{-6}$ ; 150 genes) in the comparison to the allelic series DEGs and between the CD140 DEGs set and the 6-month Q175 cerebellum DEGs for the Q175 tissues ( $p = 9.86 \times 10^{-13}$ ; 85 genes). These intersections included the glial modulators Nkx2-2, Olig1, and Olig2 as well as the genes encoding proteins involved in myelination, ion channel activity, and synaptic transmission. Overall, a number of similar significant annotations were observed for the HD Genea CD140 DEGs and the brain-derived DEGs from Langfelder et al. (2016), implicating functions that included gliogenesis, myelination, axon development, and ion channel activity.

**Figure S4** (Supplementary to Figure 1)

**Glial differentiation-associated genes are dysregulated in mHTT-expressing GPCs**

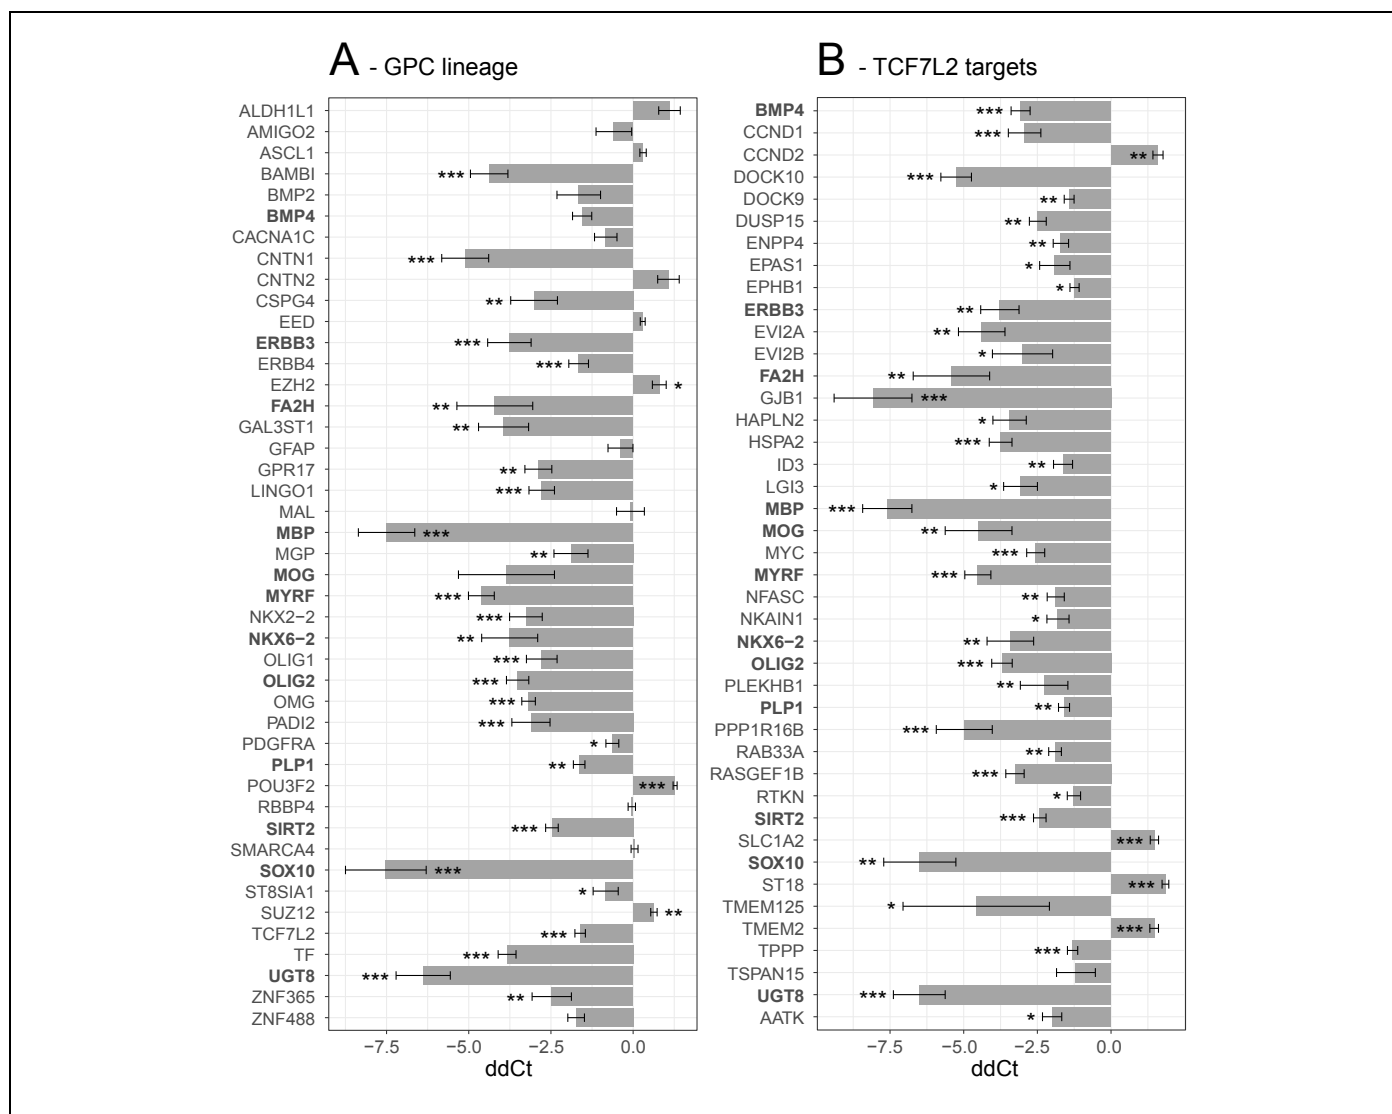

Expression of selected genes dysregulated in HD-derived GPCs, as identified by RNA-seq analysis, was assessed by TaqMan Low Density Array (TLDA) RT-qPCR and compared to that of control GPCs. Expression data were normalized to 18S and GAPDH endogenous controls. Mean ddCt values and standard error ranges calculated from 3 pooled HD GPC lines (n = 3 for lines GENE17 and GENE20, n = 5 for GENE18, total n = 11) vs. 2 pooled control GPC lines (n = 6 for GENE02 and n = 3 for GENE19, total n = 9) are shown. The difference of expression in HD and control GPCs was assessed by paired t-tests, followed by Benjamini-Hochberg (BH) multiple testing correction (\*\*p<0.01, \*p<0.05, \*p<0.1). Genes assayed on both arrays are highlighted in bold. Analysis of TLDA data was performed in ExpressionSuite software v.1.1 (Applied Biosciences). The majority of genes identified by RNA-seq as dysregulated in HD-derived GPCs were confirmed as such by TLDA. **A**, Genes encoding key GPC lineage transcription factors and stage-regulated, myelin-related proteins. 44 genes are shown, excluding MOBP and MOG, which were noted to have a high proportion of unreliable reactions. **B**, Transcriptional targets of TCF7L2, as predicted by upstream regulator analysis in IPA (<https://www.qiagenbioinformatics.com/products/ingenuity-pathway-analysis>). A total of 42 genes are shown, excluding four genes that had a high proportion of unreliable reactions.

Figure S5 (Supplementary to Figure 1)

HD-derived hGPCs showed marked dysregulation of potassium channel genes

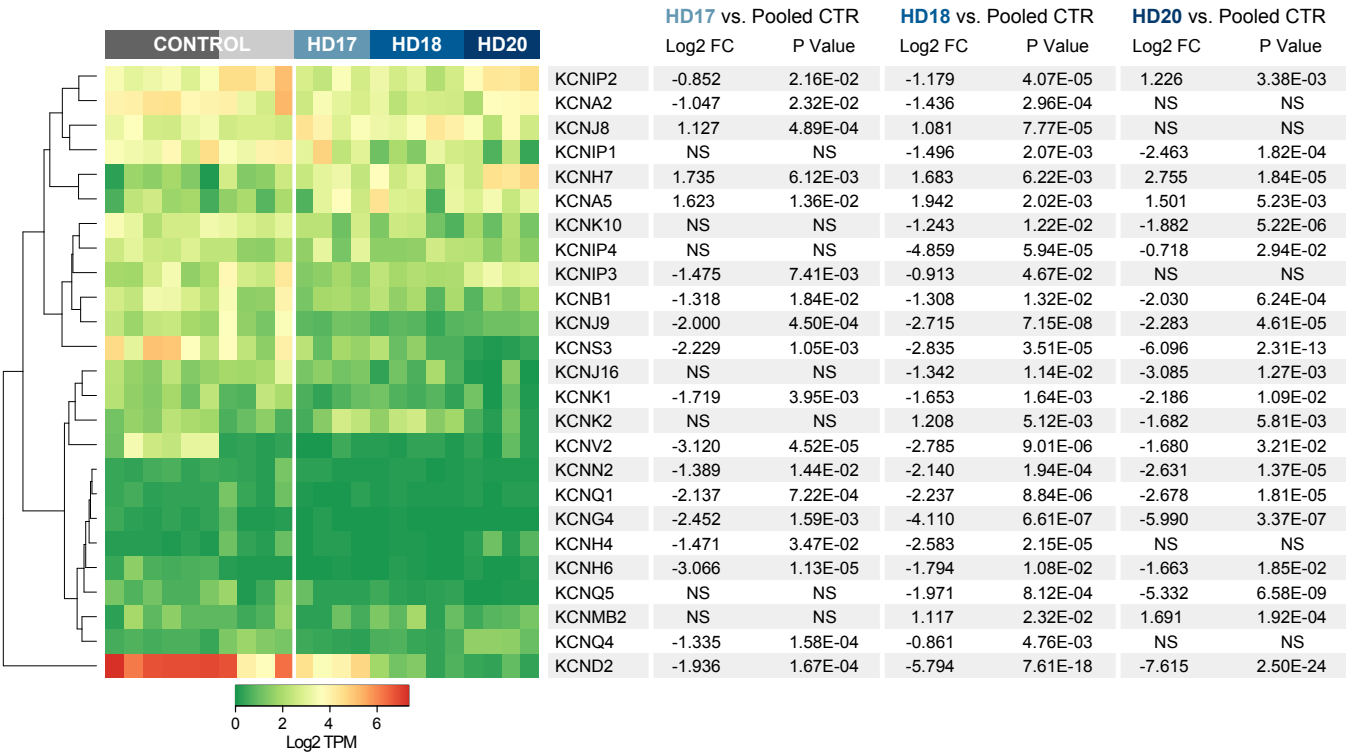

Differential gene expression comparisons (FDR 5%, no fold change threshold) of each HD-derived hGPC line against pooled control hGPCs revealed 25 potassium channel genes that were dysregulated in at least 2 out of 3 HD-derived lines. NS = not significant.

**Figure S6** (see Table S1)

**SOX10-MYRF transduction restores myelin gene expression in mHTT GPCs**

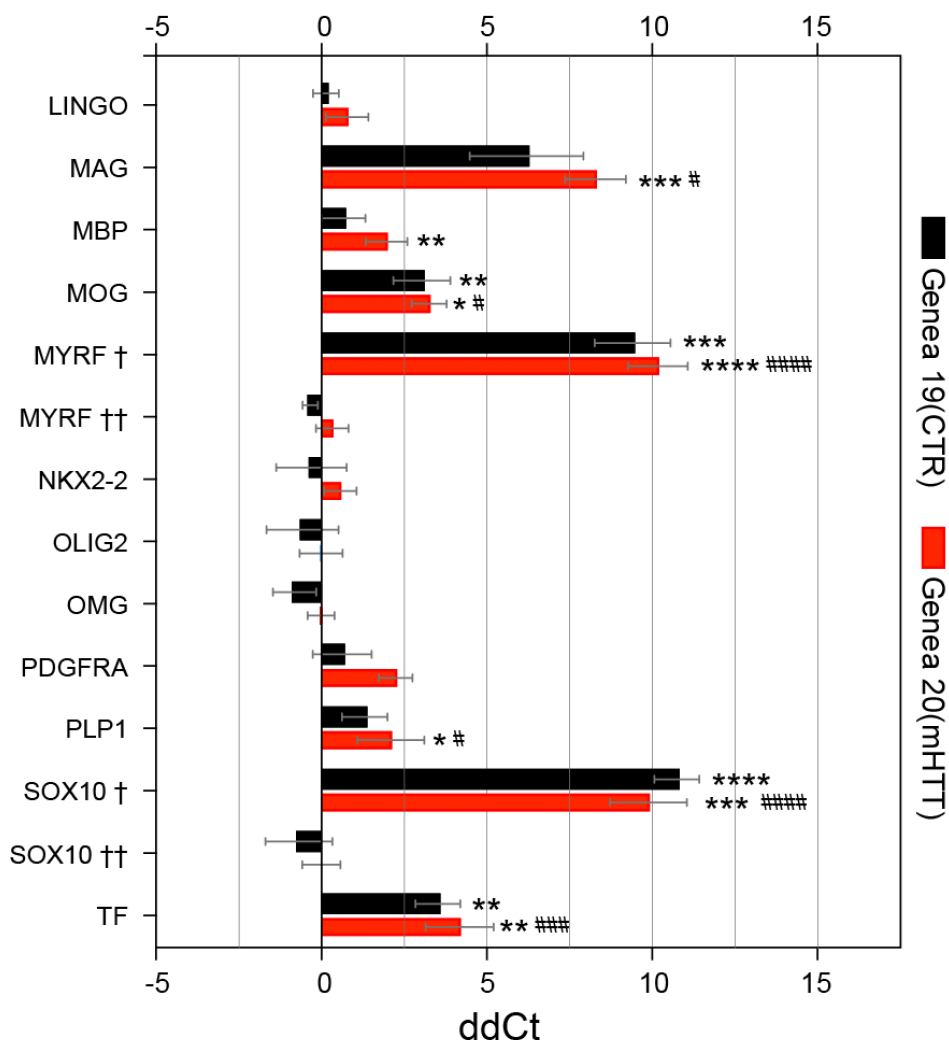

This figure shows a graphical representation of the qPCR data outlined in **Table S1**. Expression values normalized to 18S and control plasmid-transfected cells of selected oligoneogenic and myelinogenic genes in both normal (Genea19, *black bars*) and mHTT-expressing (Genea 20, *red*) hGPCs, after transfection with a bicistronic plasmid expressing SOX10 and MYRF.

Welch's *t*-test comparisons of: 1) SOX10-MYRF- vs EGFP-transfected for each line independently, significance indicated by *asterisks*; or 2) SOX10-MYRF-transfected Genea 20, vs. EGFP control-transfected Genea19 (significance indicated by *hash marks*).

\*/#  $p < 0.05$ . \*\*/##  $p < 0.01$ .; \*\*\*/###  $p < 0.001$ .; \*\*\*\*/####  $p < 0.0001$ .

†, Primers located on coding sequence; ††, primers located in 3'UTRs.

**Figure S7** (Supplementary to Figure 6)

**mHTT-expressing astrocytes exhibit diminished complexity and incomplete domain structures**

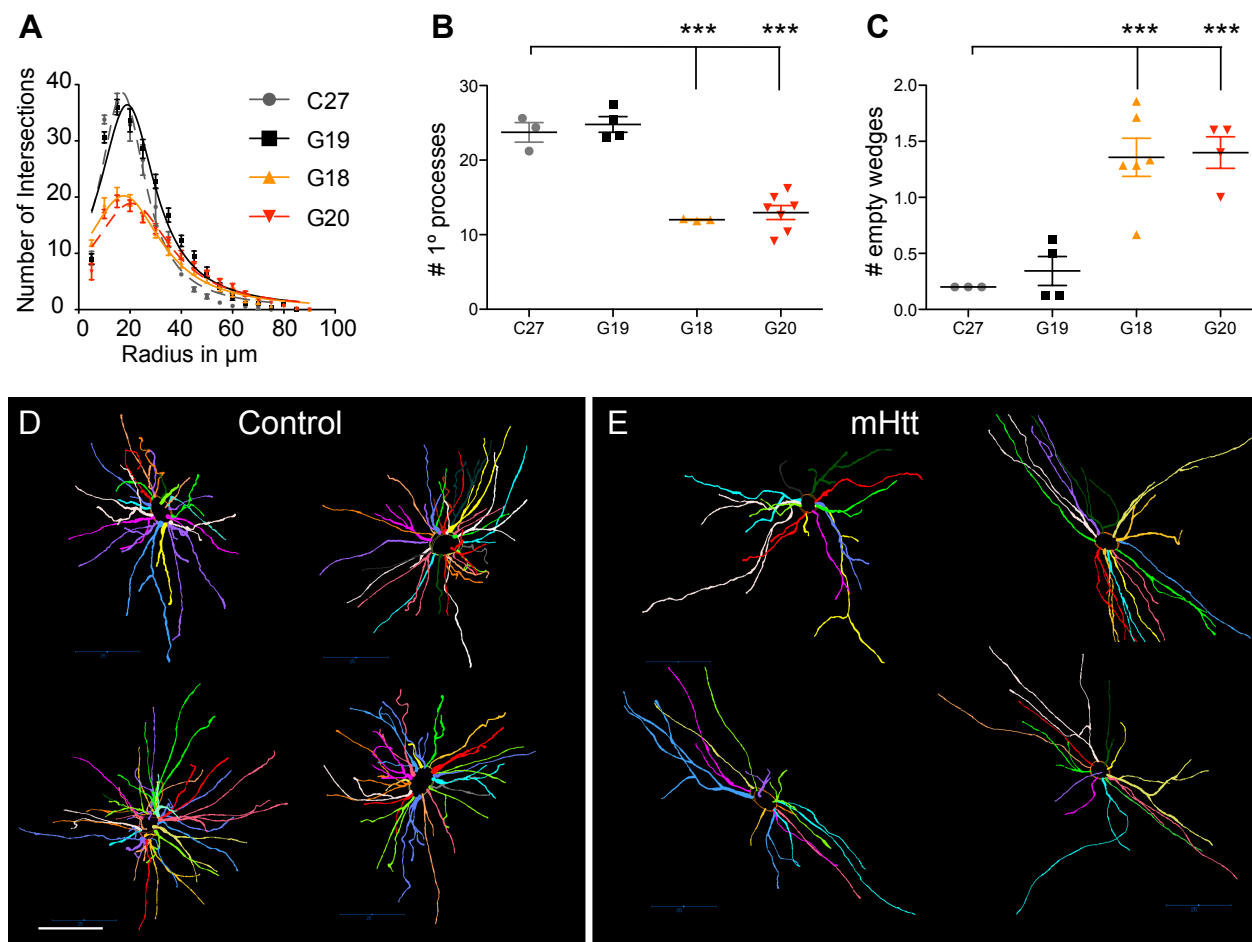

**A**, Sholl analysis of GFAP-immunostained human cells in human glial chimeras, 18 weeks after neonatal implantation. Non-linear regression curves of radial intersections for each cell line (Lorentzian curve-fit), as a function of branch order. Comparison of control (N=7) vs mHTT mice (N=10);  $p < 0.0001$ .

**B**, Both the normal HTT control line GENE19, and the unrelated normal HTT hiPS cell line C27 have more primary processes than the mHTT-expressing GENE lines, GENE18 and GENE20. The controls GENE19 and C27 are not different from one another, but both GENE18 and GENE20 are significantly different from the controls (1-way ANOVA with Dunnett's post-test;  $p < 0.0001$ ).

**C**, The fiber distributions of astrocytes derived from the two control lines, C27 and GENE19, are more radially symmetric than those of either mHTT line. One-way ANOVA with Dunnett's post-test, and C27 as the control,  $p < 0.0001$ . Both GENE18 and GENE20 are significantly different from C27,  $p < 0.0001$ .

**A-C**, Controls: C27, gray; and GENE19, black. HD-derived: GENE18, orange; GENE20, red.

**D**, Flattened 3-dimensional coronal tracings of astrocytes from the corpus callosum of mice transplanted with C27-derived control hGPCs, compared to those of mice transplanted with GENE18-derived hGPCs (**E**). Scale: **D**, 25  $\mu\text{m}$ .

**Table S1****SOX10-MYRF transduction restores myelin gene expression in mHTT GPCs**

| Target gene   | GENEA-20 (mHTT)<br>ddCt ± SEM (p-value) | GENEA-19 (normal HTT)<br>ddCt ± SEM (p-value) |
|---------------|-----------------------------------------|-----------------------------------------------|
| LINGO1        | 0.78 ± 0.64 (p=0.41)                    | 0.14 ± 0.39 (p=0.57)                          |
| MAG           | 8.29 ± 0.92 (p=0.0001)*                 | 6.21 ± 1.72 (p=0.01)*                         |
| MBP           | 1.97 ± 0.63 (p=0.005)*                  | 0.67 ± 0.66 (p=0.4)                           |
| MOG           | 3.26 ± 0.53 (p=0.02)*                   | 3.04 ± 0.86 (p=0.009)*                        |
| MYRF-Endo†    | 0.33 ± 0.49 (p=0.6)                     | -0.34 ± 0.23 (p=0.18)                         |
| NKX2.2        | 0.57 ± 0.49 (p=0.6)                     | -0.30 ± 1.06 (p=0.85)                         |
| OLIG2         | -0.01 ± 0.65 (p=0.99)                   | -0.57 ± 1.09 (p=0.79)                         |
| OMG           | -0.01 ± 0.41 (p=0.98)                   | -0.81 ± 0.66 (p=0.22)                         |
| PDGFRA        | 2.25 ± 0.51 (p=0.05)                    | 0.63 ± 0.89 (p=0.57)                          |
| PLP1          | 2.10 ± 1.01 (p=0.04)*                   | 1.31 ± 0.69 (p=0.19)                          |
| SOX10-Endo†   | 0.00 ± 0.58 (p>0.99)                    | -0.68 ± 1.01 (p=0.59)                         |
| TF            | 4.18 ± 1.03 (p=0.008)*                  | 3.52 ± 0.68 (p=0.004)*                        |
| MYRF-viral††  | 10.18 ± 0.90 (p<0.0001)*                | 9.41 ± 1.15 (p=0.0003)*                       |
| SOX10-viral†† | 9.89 ± 1.16 (p=0.0002)*                 | 10.75 ± 0.68 (p<0.0001)*                      |

These qPCR data show the ddCT values, reflecting the relative mRNA levels, of selected oligoneogenic and myelinogenic genes in normal and mHTT-expressing hGPCs, after transfection with a bicistronic plasmid expressing SOX10 and MYRF, after normalization to 18S and then control plasmid-transfected cells. Welch's *t*-test. †, Primers located on coding sequence †† Primers located in 3'UTRs. Endo: endogenous gene; Viral: viral transgene product. \*p<0.05.

**Supplementary Table S2****Primers used for real time PCR**

| <b>Target</b> | <b>Forward primer</b>   | <b>Reverse primer</b>    |
|---------------|-------------------------|--------------------------|
| LINGO1        | ACCTTCGCTTTTCATCTCCAAC  | CGATGATGAGGGTCTTGATGTC   |
| MAG           | GGACCCTATTCTCACCATCTTC  | CACACCAGTACTCTCCATCATC   |
| MBP           | CGGAGTTGTGCACGTAGTAG    | ATCTTCACACAGAAAGGGACAG   |
| MOG           | CGAATCACGAGGTCAGGAGT    | GCCCACCACTATGCTCAGTT     |
| MYRF (3'UTR)  | ACACTGGATGCAATGGTGTTA   | CAGCAACTCCAGTGTGAAGA     |
| MYRF (cDNA)   | CATCCTGTCCTTCCGTGAAT    | GAAGTGGAAGTGGTAGTCTGTG   |
| NKX2.2        | TTTATGGCCATGTAAACGTTCTG | GCAACAATCACCACCGATATT    |
| OLIG2         | GTGGGAGACTCCGGGTA       | TGAGATTGGATATGACCATCAGC  |
| OMG           | GAGGGAAGAGACAACCACAAATG | GACCACAACATTGAGCAATAAGAG |
| PDGFRA        | GAGGAGGACTTGGTTGATGTT   | TGAGATGCTACTGAGGCATTG    |
| PLP1          | GTGGCTCCAACCTTCTGTCC    | GCAGGGAAACCAGTGTAGC      |
| SOX10 (3'UTR) | CCAGTTTGACTACTCTGACCA   | TATAGGAGAAGGCCGAGTAGAG   |
| SOX10 (cDNA)  | AGGAATGACCCTCTATCCCA    | GCATGTCAGACCCTCACTATC    |
| TF            | TGTGGTCACACGGAAAGATAAG  | GTCAGTTACGTTGCTTCCAAATAG |
